# Supplementary material for: Controlled Growth of WO3 Photoanode under Various pH Conditions for Efficient Photoelectrochemical Performance
Source: MDPI journal article supplement (doi:10.3390/nano14010008), 2023-12-19
Supplement: s1 [file s1]

Supplementary Materials

# Controlled Growth of WO<sub>3</sub> Photoanode under Various pH Conditions for Efficient Photoelectrochemical Performance

Seung-Je Yoo, Dohyun Kim and Seong-Ho Baek \*

Department of Energy Engineering, Dankook University, Cheonan 31116, Republic of Korea

\* Correspondence: seongho@dankook.ac.kr

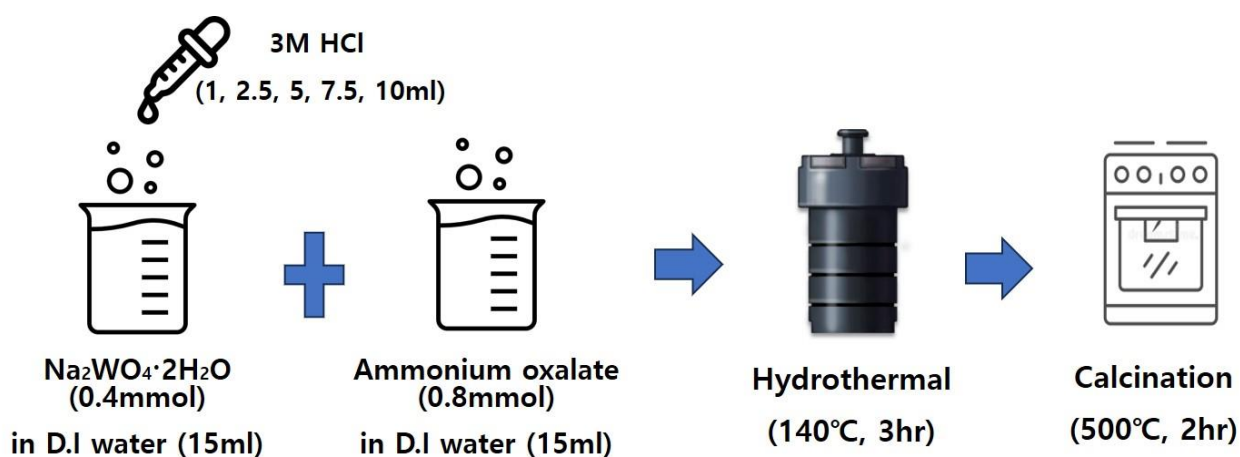

**Figure S1.** Schematics of the preparation procedures of WO<sub>3</sub>·nH<sub>2</sub>O and WO<sub>3</sub> materials.

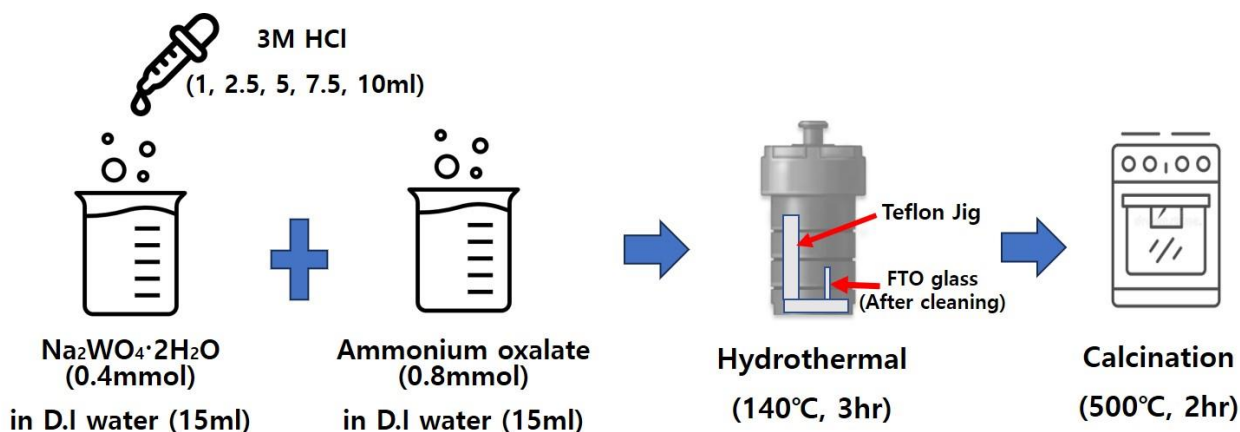

**Figure S2.** Illustrations of the preparation procedures of WO<sub>3</sub> photoanode on FTO substrate.

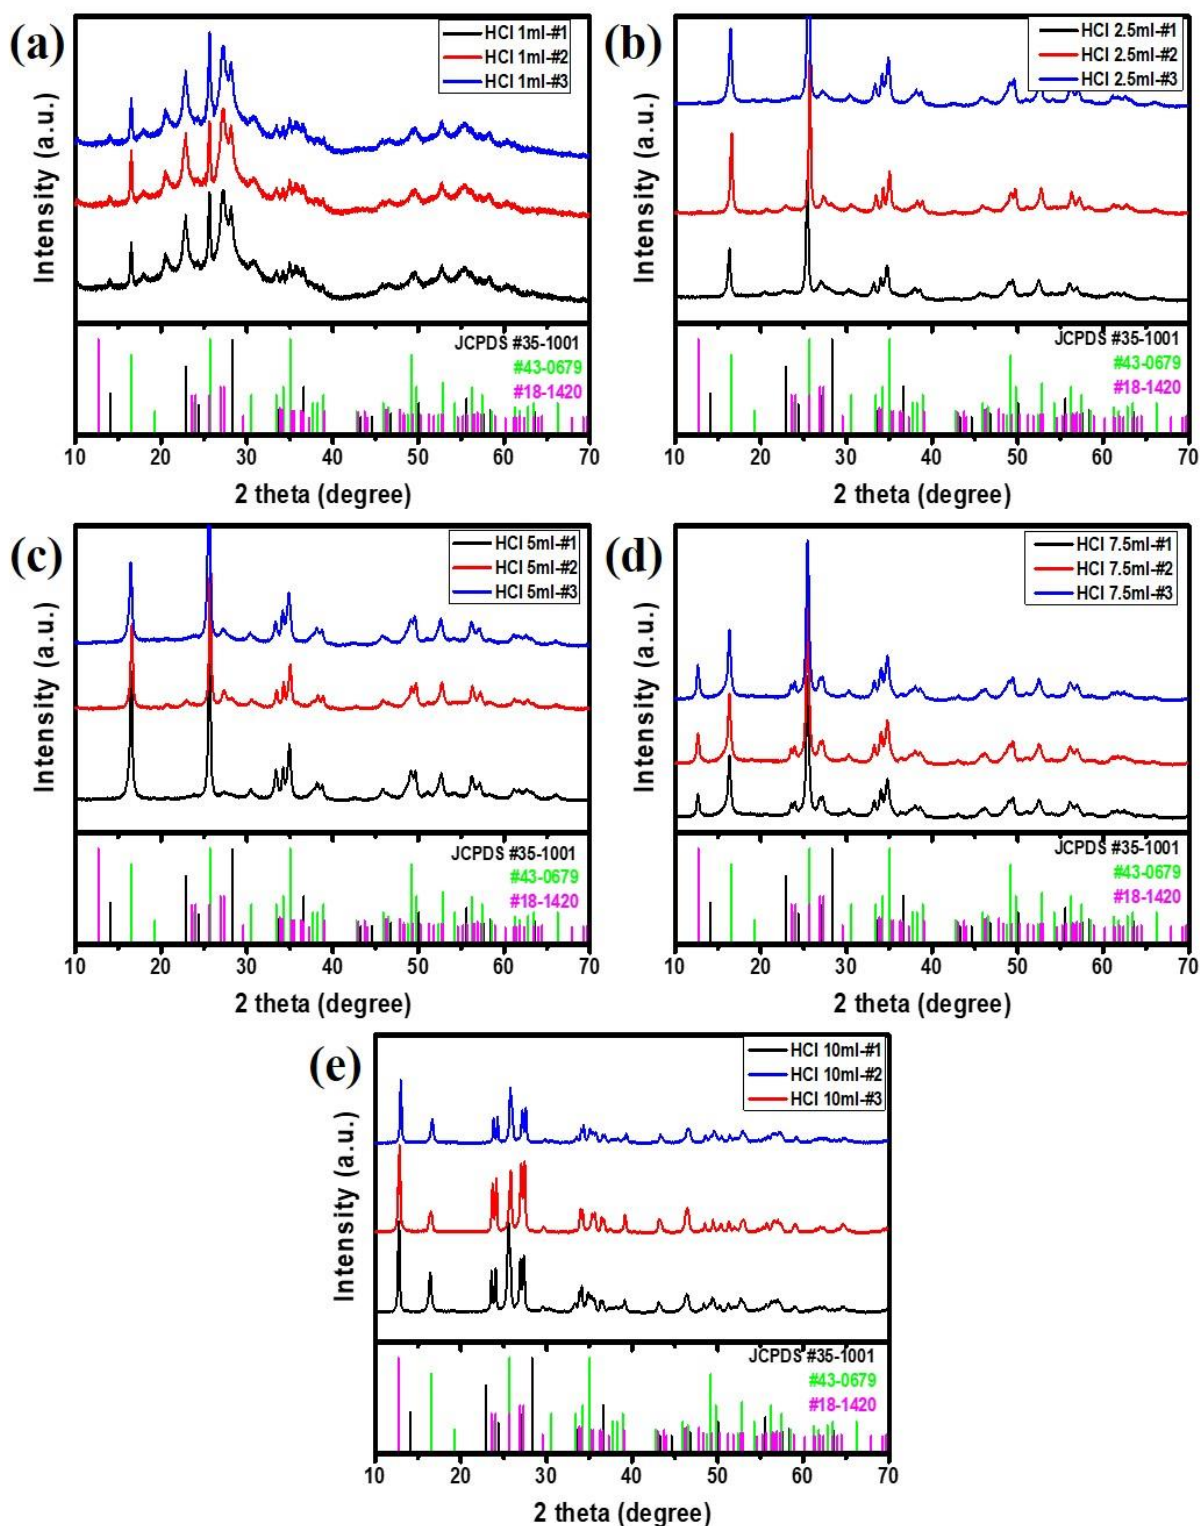

**Figure S3.** XRD spectra of the  $WO_3 \cdot nH_2O$  powders obtained by acid precipitation process with 2theta range from 10° to 70°. (a) HCl-1ml, (b) HCl-2.5ml, (c) HCl-5ml, (d) HCl-7.5ml, (e) HCl-10ml samples.

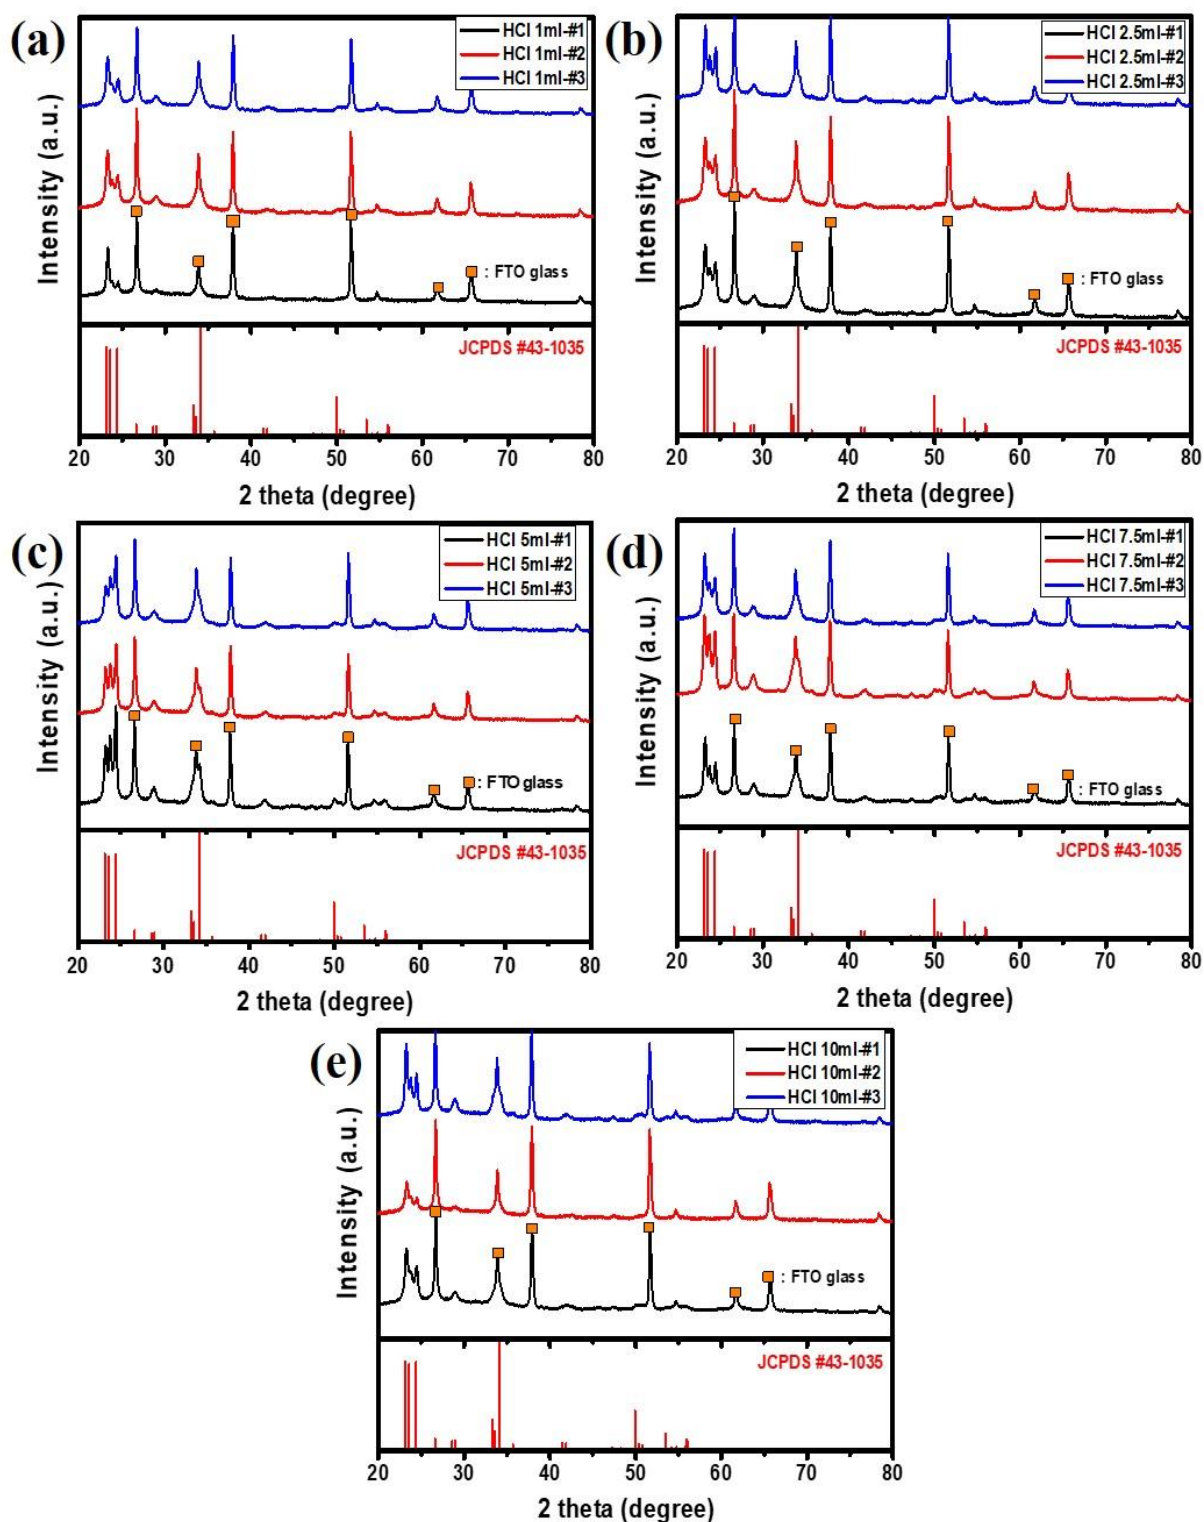

**Figure S4.** XRD spectra of the  $WO_3$  nanoplates grown on FTO glass with different HCl volume. (a) HCl-1ml, (b) HCl-2.5ml, (c) HCl-5ml, (d) HCl-7.5ml, (e) HCl-10ml samples.

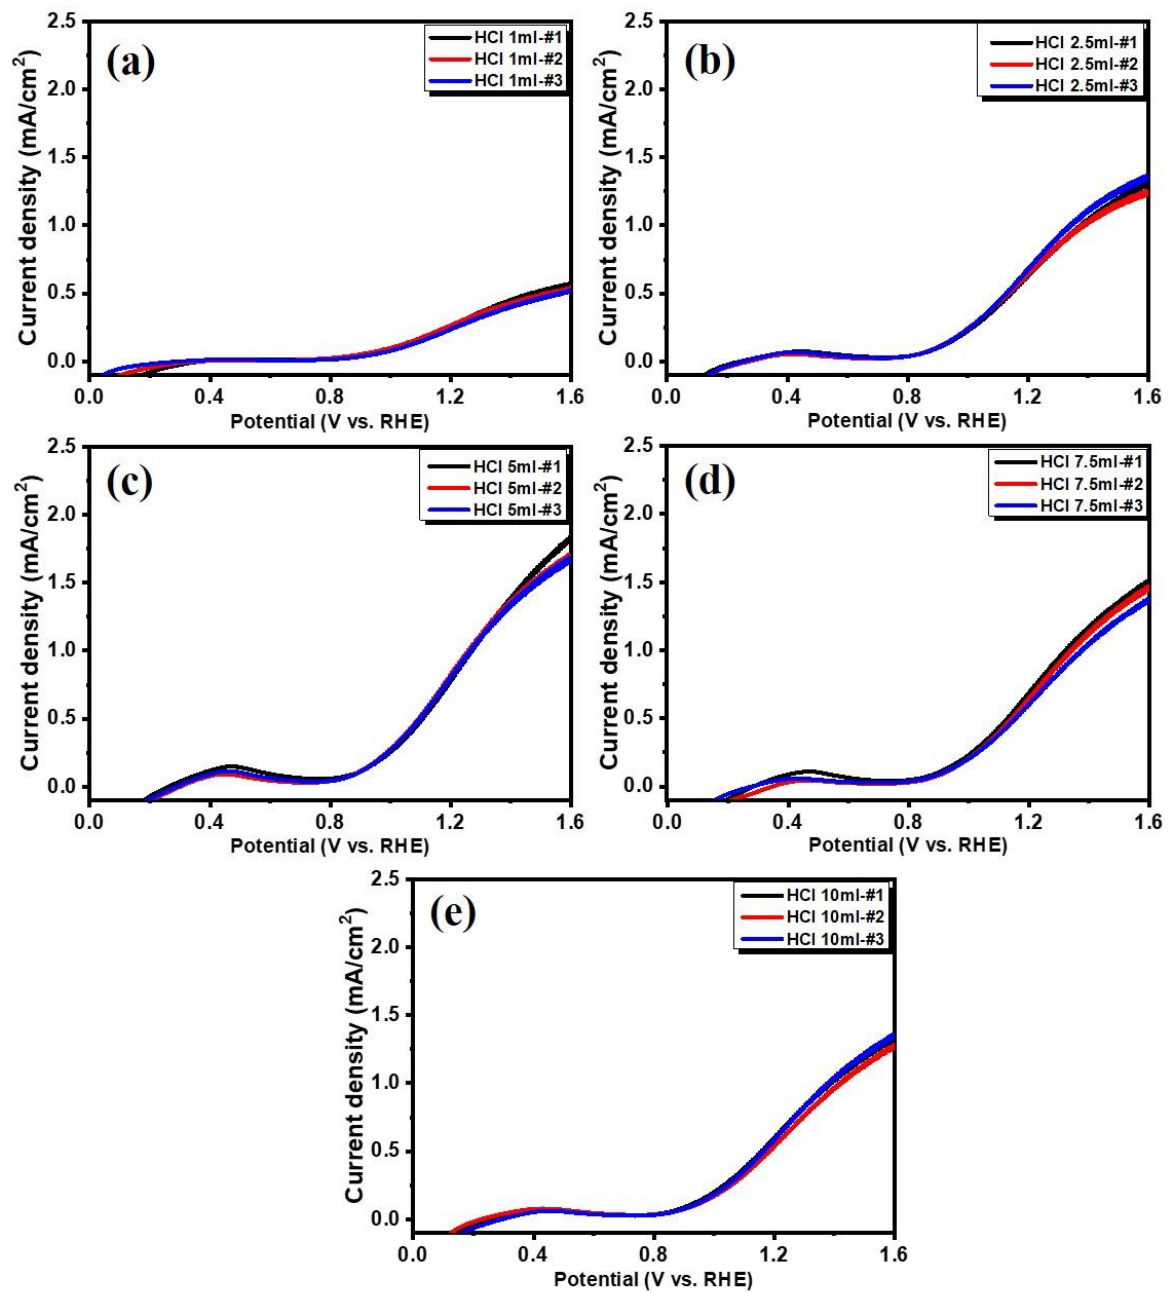

**Figure S5.** LSV curves obtained from the WO<sub>3</sub> photoanodes under AM 1.5G condition. (a) HCl-1ml, (b) HCl-2.5ml, (c) HCl-5ml, (d) HCl-7.5ml, (e) HCl-10ml samples.

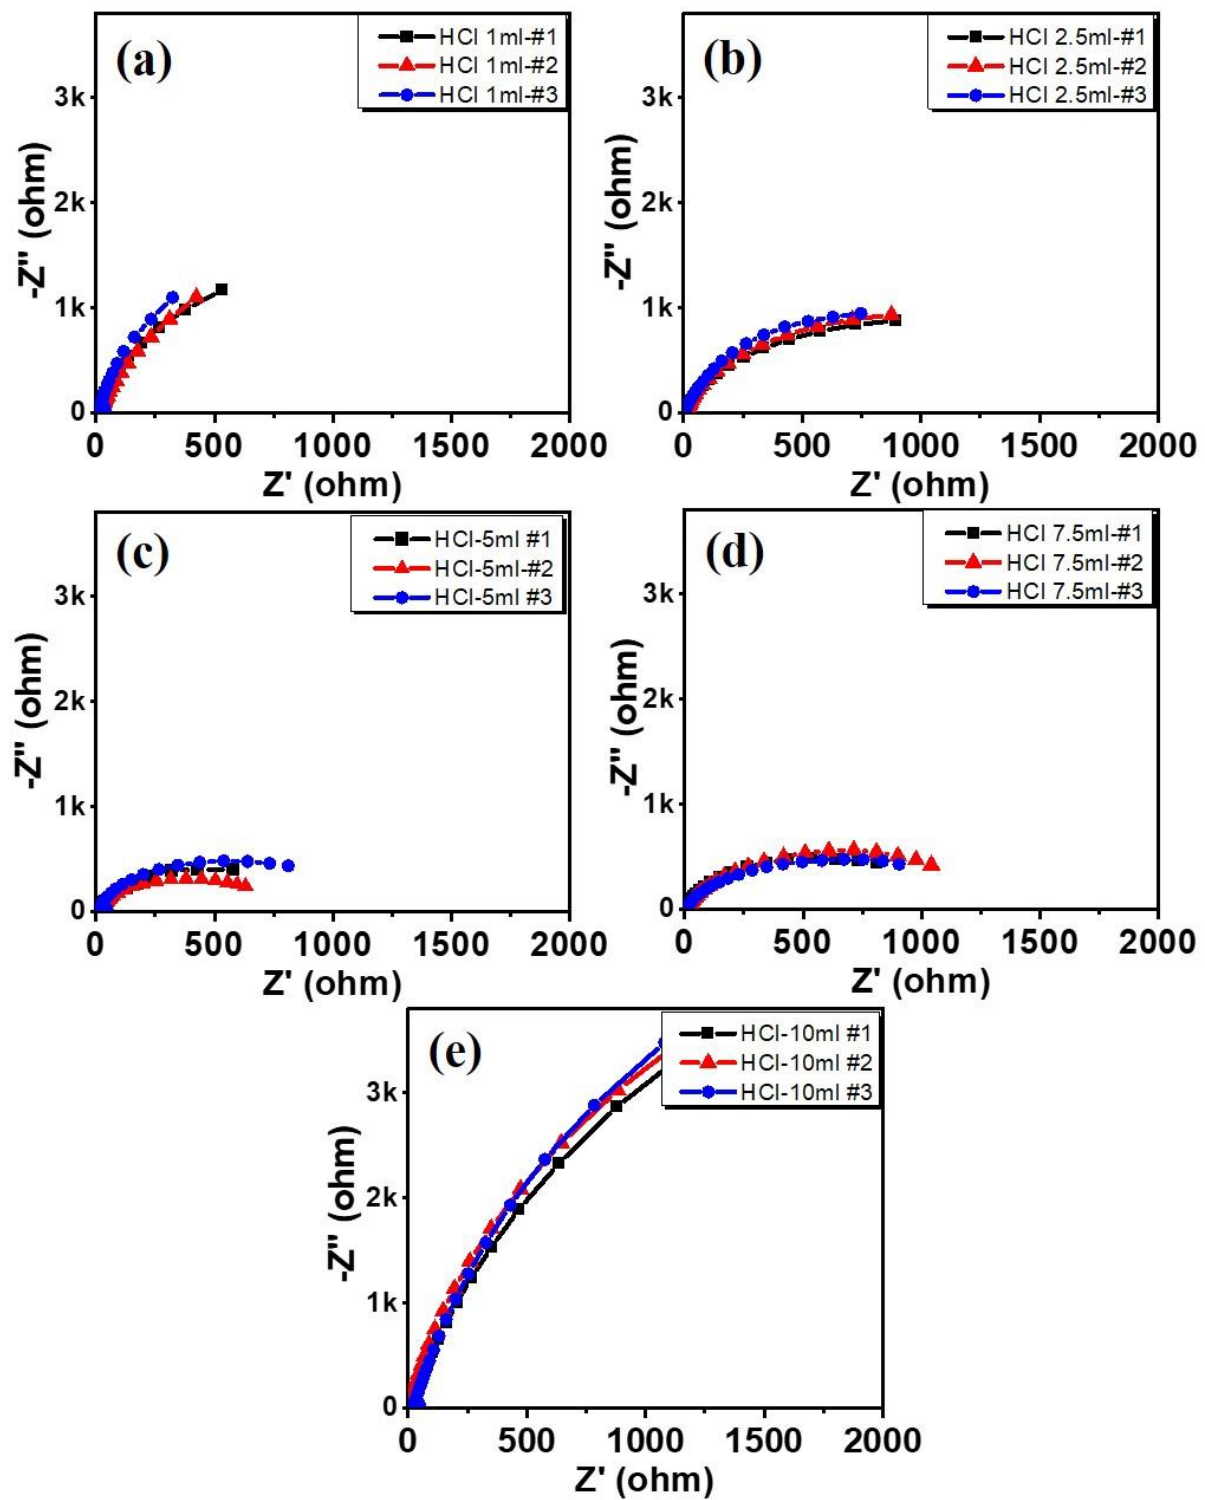

**Figure S6.** EIS Nyquist plots of all the photoanodes under AM 1.5G condition. (a) HCl-1ml, (b) HCl-2.5ml, (c) HCl-5ml, (d) HCl-7.5ml, (e) HCl-10ml samples.
